1           **MicroRNA-29 Differentially Mediates Preeclampsia-Dysregulated Cellular**  
2           **Responses to Cytokines in Female and Male Fetal Endothelial Cells**

3           Chi Zhou<sup>1,2,\*</sup>, Colman Free<sup>3,4</sup>, Olivia Mills<sup>1</sup>, Xin-Ran Yang<sup>1</sup>, Qin Yan<sup>5</sup>, and Jing Zheng<sup>3,\*</sup>

4  
5           <sup>1</sup>School of Animal and Comparative Biomedical Sciences, the University of Arizona, Tucson,  
6           AZ, United States

7           <sup>2</sup>Department of Obstetrics and Gynecology, the University of Arizona, Tucson, AZ, United  
8           States

9           <sup>3</sup>Department of Obstetrics and Gynecology, University of Wisconsin-Madison, Madison, WI,  
10          United States.

11          <sup>4</sup>Current Institution: University of Nebraska Medical Center, Omaha, NE, United States.

12          <sup>5</sup>Department of Obstetrics and Gynecology, Shanghai First Maternity and Infant Hospital, Tongji  
13          University School of Medicine, Shanghai, China

14  
15          **Short title:** MiR-29 Mediates Endothelial Dysfunction in PE

16  
17          **\*Corresponding Authors:**

18          **Chi Zhou**, Ph.D., School of Animal and Comparative Biomedical Sciences, University of  
19          Arizona, 4101 N Campbell Ave., Tucson, AZ 85719, USA.

20          Phone : (520) 621-2457. Fax : (520) 626-1283. E-mail: [chizhou@arizona.edu](mailto:chizhou@arizona.edu)

21  
22          **Jing Zheng**, Ph.D., Department of Obstetrics and Gynecology, University of Wisconsin-  
23          Madison, PAB1 UnityPoint Health-Meriter Hospital, 202 S. Park St., Madison, WI 53715, USA

24          Phone : (608) 417-6314. Fax : (608) 257-1304. E-mail: [jzheng@wisc.edu](mailto:jzheng@wisc.edu)

25 **Abstract**

26 **Introduction:** Preeclampsia (PE) differentially impairs female and male fetal endothelial cell  
27 function which is associated with the increased risks of adult-onset cardiovascular disorders in  
28 children born to mothers with PE. However, the underlying mechanisms are poorly defined. We  
29 **hypothesize** that dysregulation of microRNA-29a-3p and 29c-3p (miR-29a/c-3p) in PE disturbs  
30 gene expression and cellular responses to cytokines in fetal endothelial cells in a fetal sex-  
31 dependent manner. **Methods:** RT-qPCR analysis of miR-29a/c-3p was performed on female and  
32 male unpassaged (P0) human umbilical vein endothelial cells (HUVECs) from normotensive (NT)  
33 and PE pregnancies. Bioinformatic analysis of an RNAseq dataset was performed to identify PE-  
34 dysregulated miR-29a/c-3p target genes in female and male P0-HUVECs. Gain- and loss-of-  
35 function assays were conducted to determine the effects of miR-29a/c-3p on endothelial  
36 monolayer integrity and proliferation in response to TGF $\beta$ 1 and TNF $\alpha$  in NT and PE HUVECs at  
37 passage 1. **Results:** PE downregulated miR-29a/c-3p in male, but not female P0-HUVECs. PE  
38 dysregulated significantly more miR-29a/c-3p target genes in female vs. male P0-HUVECs. Many  
39 of these PE-differentially dysregulated miR-29a/c-3p target genes are associated with critical  
40 cardiovascular diseases and endothelial functions. We further demonstrated that miR-29a/c-3p  
41 knockdown specifically recovered the PE-abolished TGF $\beta$ 1-induced strengthening of endothelial  
42 monolayer integrity in female HUVECs, while miR-29a/c-3p overexpression specifically enhanced  
43 the TNF $\alpha$ -promoted cell proliferation in male PE HUVECs. **Conclusions:** PE differentially  
44 dysregulates miR-29a/c-3p and their target genes associated with cardiovascular diseases- and  
45 endothelial function in female and male fetal endothelial cells, possibly contributing to the fetal  
46 sex-specific endothelial dysfunction observed in PE.

47

48 **Keywords:** Preeclampsia; MicroRNA-29; Cytokines; Fetal endothelial function; Sexual  
49 dimorphisms.

50

51 **Nonstandard abbreviations:** Preeclampsia (PE); Normotensive (NT); Female (F); Male (M);  
52 Differentially expressed (DE)

## 53 **Background**

54 Preeclampsia (PE) is a hypertensive disorder that complicates 3~8% of all human  
55 pregnancies(Anderson *et al.*) and costs billions of dollars to the U.S. healthcare system  
56 annually(Stevens *et al.*). PE is a leading cause of fetal and maternal morbidity and mortality during  
57 pregnancy(Askie *et al.*; Powe *et al.*, 2011a), and adversely affects a wide range of fetal endothelial  
58 function such as cell proliferation, cell migration, monolayer integrity (or permeability), Ca<sup>++</sup>  
59 response, and nitric oxide (NO) production(Wang *et al.*; Powe *et al.*, 2011a; Boeldt *et al.*;  
60 Brodowski *et al.*; Zhou *et al.*, 2019; Zhou *et al.*, 2020). To date, the mechanisms underlying such  
61 fetal endothelial dysfunction in PE are poorly defined.

62 Pro-inflammatory cytokines are closely involved in the pathogenesis of PE(Raghupathy). For  
63 example, tumor necrosis factor- $\alpha$  (TNF $\alpha$ ) can elevate blood pressure and induce proteinuria (two  
64 hallmarks of PE) in pregnant baboons(Sunderland *et al.*). Elevated maternal circulating TNF $\alpha$  is  
65 observed in several forms of pregnancy complications including PE(Wang & Walsh; Benyo *et al.*;  
66 Hung *et al.*; Raghupathy). TNF $\alpha$  expression is also significantly increased in human PE  
67 placentas(Wang & Walsh), contributing to impaired angiogenic activity in PE(Zhou *et al.*).  
68 Similarly, TNF $\alpha$  inhibits cell proliferation(Jiang *et al.*), migration, capillary tube formation(Hsu *et al.*;  
69 *et al.*), and downregulates endothelial nitric oxide synthase (eNOS)(Kim *et al.*), as well as affects  
70 cytokine-induced endothelial leukocyte adhesion molecule expression in human umbilical vein  
71 endothelial cells (HUVECs) in vitro(Collins *et al.*; Van Antwerp *et al.*; Mahboubi *et al.*). In addition,  
72 transforming growth factor-beta1 (TGF $\beta$ 1), another growth factor and cytokine also regulates  
73 endothelial function, vascular development, and vascular barrier function(ten Dijke & Arthur;  
74 Walshe *et al.*, 2009). In PE, TGF $\beta$ 1 levels are significantly elevated in maternal circulation and  
75 are associated with PE-induced endothelial dysfunction(Muy-Rivera *et al.*; Peracoli *et al.*; Lau *et al.*;  
76 *et al.*, 2013). MicroRNAs (miRNAs) are critical regulators of endothelial function (e.g., proliferation  
77 and migration)(Wu *et al.*; Zhou *et al.*, 2017). MiR-29a-3p and miR-29c-3p (refer to as miR-29a/c-  
78 3p) are expressed in human endothelial cells and play important roles in maintaining endothelial  
79 function(Poliseno *et al.*; Wang *et al.*; Yang *et al.*). Dysregulation of miR-29a/c-3p is associated  
80 with cardiovascular diseases (e.g., stroke(Kajantie *et al.*) and heart failure(Thum *et al.*)), which  
81 may be partially due to their roles in endothelial cells. Overexpression of miR-29a-3p promotes  
82 angiogenesis, whereas knockdown of miR-29a-3p blocks TGF $\beta$ 1-stimulated angiogenesis in a  
83 chick chorioallantoic membrane assay(Wang *et al.*). We have previously reported that PE  
84 downregulates miR-29a/c-3p in primary HUVECs and that knockdown of miR-29a/c-3p inhibits  
85 growth factor-stimulated fetal endothelial motility in HUVECs(Zhou *et al.*). However, it is unknown

86 if PE differentially dysregulates the expression and function of miR-29a/c-3p in female (F) and  
87 male (M) HUVECs.

88 Increasing evidence has shown that sex is an important regulator of biological processes and  
89 cell function. Sexual dimorphisms of fetal endothelial function have been reported in HUVECs  
90 from normotensive (NT) pregnancies in cell proliferation, cell viability, tube formation capacity,  
91 migration, and endothelial eNOS expression(Addis *et al.*; Lorenz *et al.*). We have also  
92 demonstrated that PE differentially dysregulates F and M fetal endothelial transcriptomic profiles  
93 and endothelial cell responses (monolayer integrity and proliferation) to growth factors and  
94 cytokines (TNF $\alpha$  and TGF $\beta$ )(Zhou *et al.*, 2019).

95 In this study, we tested the hypothesis that miR-29a/c-3p is differentially expressed and  
96 mediates PE-dysregulated cell responses to cytokines (TNF $\alpha$  and TGF $\beta$ ) in fetal endothelial cells  
97 in a fetal sex-specific manner using HUVECs as a cell model. We determined the PE differentially  
98 dysregulated miR-29a/c-3p expression in F and M HUVECs and fetoplacental tissues from NT  
99 and PE pregnancies. Bioinformatics and gene ontology analyses were performed to identify PE-  
100 dysregulated miR-29a/c-3p target genes/pathways in F and M P0-HUVECs. We also examined  
101 the effect of miR-29a/c-3p knockdown and overexpression on endothelial monolayer integrity, cell  
102 proliferation, and migration in responses to cytokines in primary F and M HUVECs from NT and  
103 PE.

104

## 105 **Methods**

106 The authors declare that all supporting data are available within the article and its online  
107 supplementary files.

## 108 **Ethical approval**

109 All procedures were conducted in accordance with the Declaration of Helsinki. This research  
110 has been approved by the Institutional Review Board of the University of Arizona (Protocol#  
111 2104723252) as well as the UnityPoint Health-Meriter Hospital (Madison, WI) and the University  
112 of Wisconsin-Madison (Protocol#2004-006). All subjects gave written, informed consent. PE was  
113 defined according to standard American College of Obstetricians and Gynecologists  
114 criteria(American College of *et al.*, 2013). All PE patients included in this study were late-onset  
115 mild PE without major fetal morbidity. Due to the local demographics, all subjects included in this  
116 study are Caucasian.

## 117 **Isolation, purification, and characterization of primary HUVECs**

118 F and M HUVECs were isolated immediately after deliveries of NT and PE pregnancies  
119 (Table.1). Cells were then purified using CD31 dynalbeads (Invitrogen, Carlsbad, CA) within ~16h

120 of culture as previously described(Zhou *et al.*, 2017; Zhou *et al.*, 2019). After purification, 80% of  
121 cells (referred to as P0-HUVECs) were immediately snap-frozen in liquid nitrogen until total RNA  
122 isolation, and the remaining 20% of cells were cultured to P1 (~5 days of culture). The purity of  
123 each cell preparation was evaluated using the Dil-Ac-LDL uptake assay as previously  
124 described(Zhou *et al.*, 2017; Zhou *et al.*, 2019). Only cell preparations with  $\geq 96\%$  positive Dil-Ac-  
125 LDL uptake were used in this study.

### 126 **Human fetoplacental tissue collection**

127 Human fetoplacental tissues were dissected from the placenta immediately after delivery.  
128 After dissection, fetoplacental tissue samples were snap-frozen in liquid nitrogen, stored at  $-80^{\circ}\text{C}$ ,  
129 and then ground to powder in liquid nitrogen followed by RNA isolation.

### 130 **RNA isolation and quality control**

131 Small RNA-enriched total RNA samples were isolated from P0-HUVECs and placentas using  
132 the RNeasy Mini Kit (Qiagen, Valencia, CA). The concentration and quality of each RNA sample  
133 were assessed using a NanoDrop™ND-1000 spectrophotometer (NanoDrop Technologies,  
134 Wilmington, DE) and Agilent 2100-bioanalyzer (Agilent Technologies, Santa Clara, CA)(Zhou *et*  
135 *al.*, 2017; Zhou *et al.*, 2019). Only RNA samples with a high RNA integrity number ( $>8$ ) were  
136 utilized in this study.

### 137 **RT-qPCR analysis of miR-29a/c-3p in human placentas and P0-HUVECs**

138 To determine the PE-dysregulated miR-29a/c-3p expression in placentas and P0-HUVECs ,  
139 RT-qPCR analysis was performed in F and M fetoplacental tissues and P0-HUVECs from NT and  
140 PE pregnancies (Table1; n=12-27cell preparations/group/sex) as previously described(Zhou *et*  
141 *al.*, 2017). In brief, small RNA fragment enriched total RNA isolated from each sample was reverse  
142 transcribed into cDNA using a miScript II RT Kit (Qiagen). RT-qPCR was performed using  
143 miScriptSYBR Green PCR Kit (Qiagen) and commercially available miRNA Primer Assays  
144 (Table.S1) using a StepOne<sup>Plus</sup> qPCR system (Life Technologies, Carlsbad, CA). Efficiencies of  
145 all target and control miRNA assays were between 90% and 110%. Data were first normalized to  
146 an external control (miRTC, Qiagen), followed by normalization to the geometric mean of  
147 endogenous control miRNAs (SNORD95, and SNORD96A). The normalized data were then  
148 analyzed using the  $2^{-\Delta\Delta\text{CT}}$  method(Yuan *et al.*, 2006; Zhou *et al.*, 2017).

### 149 **Bioinformatic analysis of RNAseq dataset on P0-HUVECs**

150 We re-analyzed a previously published RNAseq dataset from P0-HUVECs (NCBI GEO  
151 accession: GSE116428(Zhou *et al.*, 2019)) to identify PE dysregulated miR-29a/c-3p target genes  
152 in P0-HUVECs (Table.S2&S3). MiR-29a/c-3p target genes were determined using TarBase  
153 v.8(Karagkouni *et al.*, 2018) (experiment supported miRNA targets database) and microT-

154 CDS(Paraskevopoulou *et al.*, 2013) databases. Functional genomics analysis of these PE-  
155 dysregulated miR-29a/c-3p target genes was performed to predict the enriched canonical  
156 pathways, diseases and biological functions, as well as gene networks using Ingenuity Pathway  
157 Analysis (IPA; [www.qiagenbioinformatics.com](http://www.qiagenbioinformatics.com))(Kramer *et al.*, 2014; Zhou *et al.*, 2019).

### 158 **Knockdown and overexpression of miR-29a/c-3p in F and M P1-HUVECs**

159 Knockdown and overexpression of miR-29a/c-3p were performed using miScript miRNA  
160 mimics [Qiagen, refer as miRNA(+)] and miScript miRNA Inhibitor [Qiagen, refer as miRNA(i)]  
161 respectively, as described(Ukai *et al.*, 2012; Zhou *et al.*, 2017). Transfection dose and time were  
162 pre-determined as described(Zhou *et al.*, 2017) (Fig.S1 and Supplemental Methods). MiRNA  
163 mimics and inhibitors were chemically synthesized and modified single-strand RNAs that  
164 specifically overexpress and inhibit target miRNA(Ukai *et al.*, 2012; Zhou *et al.*, 2017). In brief,  
165 individual primary P1-HUVECs at 50-60% confluence were transfected with miRNA mimic  
166 targeting human miR-29a/c-3p [miR-29a/c-3p(+); MSY0000086; Qiagen] and miRNA inhibitor  
167 targeting human miR-29a/c-3p [miR-29a/c-3p(i); MIN0000681; Qiagen] using the Qiagen  
168 HiPerFect Transfection Reagent for 24hr. Cells transfected with only the transfection reagent and  
169 miScript inhibitor negative control were used as the vehicle (Veh) and negative control (NC),  
170 respectively(Zhou *et al.*, 2017). RT-qPCR was used to verify the efficiency of miRNA knockdown  
171 and overexpression.

### 172 **Cell functional assays**

173 After successful knockdown and overexpression of miR-29a/c-3p, P1-HUVECs were treated  
174 with TNF $\alpha$  (10ng/ml), TGF $\beta$  (10ng/ml), or serum-free endothelial culture media (ECMb, control)  
175 followed by cell functional assays as previously described(Zhou *et al.*, 2019) (n=5~10 cell  
176 preparations/sex/group; Supplemental methods). The dose and duration of TNF $\alpha$  and TGF $\beta$   
177 treatments for each cell functional assay were determined based on our previous reports(Zhou *et al.*  
178 *et al.*, 2017; Zhou *et al.*, 2019). Endothelial monolayer integrity was determined using the ECIS  
179 Z $\theta$ +96-well array station (Applied BioPhysics, NY) using 96W10idf plates(Zhou *et al.*, 2019). Cell  
180 proliferation was assessed using the CCK-8 kit (Dojindo Molecular Technologies, Rockville,  
181 MD)(Zhou *et al.*, 2019).

### 182 **Statistical analyses**

183 SigmaPlot software (Systat Software., San Jose, CA) was used for statistical analyses. Data  
184 are represented as the medians  $\pm$  standard deviation (SD). Data analyses were performed using  
185 the Mann-Whitney Rank Sum Test or Kruskal-Wallis test as appropriate. Differences were  
186 considered significant when  $P < 0.05$ . Benjamini and Hochberg False Discovery Rate (FDR)-

187 adjustment(Zhou *et al.*, 2017; Zhou *et al.*, 2019) was used for multiple comparison correction as  
188 appropriate.

189

## 190 **Results**

### 191 **PE differentially dysregulates miR-29a/c-3p expression in F and M placentas and HUVECs.**

192 Compared with NT, PE increased the levels of miR-29a-3p and miR-29c-3p by 72% and  
193 106%, respectively, in F, but not M placentas (Fig.1A). Both miR-29a-3p and miR-29c-3p levels  
194 were significantly higher in F than in M PE placentas. In contrast, PE decreased the levels of miR-  
195 29a-3p and miR-29c-3p by 15% and 24%, respectively, in M but not F P0-HUVECs (Fig.1B).  
196 There were no significant differences in miR-29a-3p and miR-29c-3p levels between F and M  
197 placentas and P0-HUVECs from NT. However, miR-29a-3p and miR-29c-3p levels were  
198 significantly higher in F than in M placentas, while miR-29c-3p levels were higher in F vs. M PE  
199 P0-HUVECs.

### 200 **PE differentially dysregulates miR-29a/c-3p target genes in F and M HUVECs**

201 Re-analysis of our previously published RNAseq dataset on P0-HUVECs (NCBI GEO  
202 accession: GSE116428(Zhou *et al.*, 2019)) have identified 2883 (2357 experimentally supported  
203 and 526 theoretically predicted, Table.S2) miR-29a/c-3p target genes in P0-HUVECs (Fig. 2B).  
204 Among them, 1631 were common target genes of miR-29a/c-3p, while 477 and 775 were miR-  
205 29a-3p and miR-29c-3p specific target genes, respectively (Table.S2). Our analysis also showed  
206 that PE differentially dysregulated miR-29a/c-3p target genes in F and M P0-HUVECs (Fig.2A-C,  
207 Table.S3). A total of 125 miR-29a/c-3p target genes were differentially expressed (DE) between  
208 NT-F and NT-M P0-HUVECs (Fig.2B-C, Table.S3), among which two and one genes are located  
209 on X- and Y-chromosomes, respectively (Table.S3). In PE-F P0-HUVECs, 110 miR-29a/c-3p  
210 target genes were dysregulated with two DE genes located on X-chromosome (Fig.2B-C,  
211 Table.S3). In PE-M P0-HUVECs, 28 miR-29a/c-3p target genes were dysregulated with two DE-  
212 genes located on the X-chromosome; none of these DE genes located on the Y-chromosome  
213 (Fig.2B-C, Table.S3). Only five miR-29a/c-3p target genes (ARC, CILP2, NEFM, GRIN2B, and  
214 CHRNA7) were dysregulated in both PE-F and PE-M P0-HUVECs (Fig.2B-C, Table.S3). All these  
215 five genes were down-regulated in PE-F, but up-regulated in PE-M P0-HUVECs (Table.S3).

### 216 **PE differentially dysregulates cardiovascular diseases- and endothelial function- 217 associated miR-29a/c-3p target genes in F and M HUVECs**

218 Canonical pathways enrichment analysis on PE-dysregulated genes in F and M P0-HUVECs  
219 (Fig.2D and S2) indicated that only one miR-29a/c-3p target canonical pathway (pulmonary  
220 fibrosis idiopathic signaling pathway) was significantly dysregulated in both PE-F and PE-M

221 HUVECs. Nine canonical pathways were enriched only in PE-F HUVECs, and six of these  
222 pathways including wound healing signaling pathway and pathogenesis of multiple sclerosis were  
223 enriched only in PE-upregulated miR-29a/c-3p target genes in PE-F HUVECs.

224 Diseases and Bio-function enrichment analysis on PE-dysregulated genes in P0-HUVECs  
225 (Fig.2E and S3, Table.S4, S5 and S6) further showed that miR-29a/c-3p target genes associated  
226 with angiogenesis, atherosclerosis, cell viability, concentration of Ca<sup>2+</sup>, disorder of blood pressure,  
227 obesity, and seizures were dysregulated in PE-F and PE-M HUVECs. Specifically,  
228 atherosclerosis, concentration of Ca<sup>2+</sup>, disorder of blood pressure, and seizures-associated miR-  
229 29a/c-3p target genes were only enriched in PE-upregulated genes in M-HUVECs, while  
230 concentration of Ca<sup>2+</sup>, cell viability, and seizures-associated miR-29a/c-3p target genes were only  
231 enriched in PE-downregulated genes in F-HUVECs (Fig.S3, Table S5). Additionally, miR-29a/c-  
232 3p target genes associated with accumulation of lipid, cellular infiltration, invasion of cells,  
233 migration of endothelial cells, chemotaxis, inflammatory response, adhesion of immune cells,  
234 recruitment of mononuclear leukocytes, apoptosis of antigen presenting cells, and disruption of  
235 microvascular endothelial cells were only enriched in PE-upregulated genes in F-HUVECs.  
236 However, miR-29a/c-3p target genes associated with accumulation of extracellular matrix,  
237 adhesion of endothelial progenitor cells, concentration of reactive oxygen species, remodeling of  
238 blood vessel, vasodilation of pulmonary artery, hypertension, and stroke were only enriched in  
239 PE-upregulated genes in M-HUVECs.

240 Upstream regulator analysis on PE-dysregulated genes in P0-HUVECs (Table.2, Table.S7)  
241 revealed that TNF-, TGFB1-, IFNG-, IL1B-, MYC-, AGT-, FOXO1-, MAPK1-, PDGF BB-, F2-, and  
242 CSF2-regulated miR-29a/c-3p target genes were enriched in both PE-F and PE-M HUVECs, in  
243 which PE-F HUVECs has more PE-dysregulated miR-29a/c-3p target genes in all these gene  
244 networks than PE-M cells. In addition, NFκB-, IL33-, and IL1-regulated miR-29a/c-3p target genes  
245 were uniquely enriched in PE-F HUVECs.

#### 246 **MiR-29a/c-3p differentially regulate endothelial monolayer integrity in F and M HUVECs** 247 **from NT and PE**

248 Compared with NC, miR-29a/c-3p(+) at 10nM significantly increased (> 340%) the level of  
249 both miR-29a-3p and miR-29c-3p in HUVECs 24h after transfection and this overexpression  
250 maintained for up to 72h (Fig.S1). We previously reported that miR-29a/c-3p(i) at 50nM  
251 significantly decreased the levels of both miR-29a-3p and miR-29c-3p in HUVECs after 24-72h  
252 of transfection(Zhou *et al.*, 2017). Hence miR-29a/c-3p(+) at 10nM and miR-29a/c-3p(i) at 50nM  
253 were utilized in all miR-29a/c-3p overexpression and knockdown experiments in this study.



254 Veh and NC did not alter the endothelial monolayer integrity in all cell groups treated with  
255 ECMb, TGF $\beta$ 1, and TNF $\alpha$  (Fig.3 and Fig.S4).

256 Compared with Veh and NC, miR-29a/c-3p(+) time-dependently increased electrical  
257 resistance (strengthening endothelial monolayer integrity) in NT-F HUVECs, but not in NT-M PE-  
258 F and PE-M HUVECs (Fig.3A). Specifically, in NT-F HUVECs, miR-29a/c-3p(+) strengthened  
259 endothelial monolayer integrity, beginning at 7h and reached a maximum increase of ~15% at  
260 24h. This miR-29a/c-3p(+)-enhanced monolayer integrity was lost in PE-F HUVECs.

261 Compared with Veh and NC, miR-29a/c-3p(i) time-dependently decreased electrical  
262 resistance (weakening endothelial monolayer integrity) only in NT-M, but not in NT-F, PE-F, and  
263 PE-M HUVECs in ECMb (Fig.3A). Specifically, in NT-M HUVECs, miR-29a/c-3p(i) weakened  
264 endothelial monolayer integrity, beginning at 10h, reached a maximum of ~9% decrease at 16h  
265 and maintained this level through 25h.

#### 266 **MiR-29a/c-3p differentially regulate endothelial monolayer integrity in response to TGF $\beta$ 1** 267 **in F and M HUVECs from NT and PE**

268 Compared with ECMb, TGF $\beta$ 1 time-dependently strengthened endothelial monolayer  
269 integrity in NT-F HUVECs, but not in NT-M, PE-F, and PE-M HUVECs. Specifically, TGF $\beta$ 1  
270 strengthened endothelial monolayer integrity in NT-F transfected with Veh and NC, starting at 15h  
271 and reaching 14% and 9% enhancement at 25h, respectively (Fig.3B). MiR-29a/c-3p(+) further  
272 enhanced the TGF $\beta$ 1-strengthened endothelial monolayer integrity in NT-F HUVECs, starting at  
273 16h and reaching 21% enhancement at 25h. The TGF $\beta$ 1-strengthened endothelial monolayer  
274 integrity in F HUVECs was abolished in PE-F cells, while miR-29a/c-3p(i) recovered this TGF $\beta$ 1-  
275 strengthened endothelial monolayer integrity in PE-F HUVECs (reaching 15% enhancement at  
276 25h). MiR-29a/c-3p(i) did not alter endothelial monolayer integrity in NT-F, NT-M, and PE-M  
277 HUVECs.

278 Compared to ECMb, TNF $\alpha$  significantly decreased the endothelial monolayer integrity in NT-  
279 F, NT-M, PE-F, and PE-M HUVECs (Fig.S4). MiR-29a/c-3p(i) and miR-29a/c-3p(+) did not alter  
280 the TNF $\alpha$ -weakened endothelial monolayer integrity in NT-F, NT-M, PE-F, and PE-M HUVECs.

#### 281 **MiR-29a/c-3p differentially regulate TNF $\alpha$ -induced cell proliferation in F and M HUVECs** 282 **from PE**

283 Veh and NC did not alter the cell proliferation in all cell groups treated with ECMb, TGF $\beta$ 1,  
284 and TNF $\alpha$ . Compared with Veh and NC control, miR-29a/c-3p(+) and miR-29a/c-3p(i) did not alter  
285 the cell proliferation in response to ECMb and TGF $\beta$ 1 in NT-F, NT-M, PE-F, and PE-M (Fig.4).

286 Compared to ECMb control, TNF $\alpha$  promoted cell proliferation in PE-F (159%) and NT-M  
287 (153%) HUVECs (Fig.4C). Compared to Veh and NC, miR-29a/c-3p(+) further promoted the cell

288 proliferation in PE-M HUVECs (181% of ECMB control), while miR-29a/c-3p(i) did not affect the  
289 endothelial proliferation responses to TNF $\alpha$  in all HUVECs groups.

290

## 291 **Discussion**

292 In this study, we have demonstrated for the first time that PE dysregulates miR-29a/c-3p in  
293 fetoplacental tissues and primary human fetal endothelial cells (HUVECs) in a fetal sex-specific  
294 manner. We have further shown fetal sex-specific dysregulation of cardiovascular diseases- and  
295 endothelial function-associated miR-29a/c-3p target genes in F and M fetal endothelial cells from  
296 PE. Moreover, miR-29a/c-3p overexpression and knockdown differentially affect PE-dysregulated  
297 fetal endothelial cell responses to cytokines in F and M HUVECs. These data indicate fetal sex-  
298 specific roles of miR-29a/c-3p in PE-dysregulated transcriptomic profiles and cell functions in fetal  
299 endothelial cells.

300 Expression of miR-29a/c-3p in human placentas are significantly higher in the third trimester  
301 than that in the first trimester(Gu *et al.*, 2013), suggesting miR-29a/c-3p play important roles in  
302 placental development and function. Our current finding that PE upregulated miR-29a/c-3p levels  
303 in F, but not M fetoplacentas agrees with a previous report that miR-29a-3p is elevated in maternal  
304 plasma from mild PE patients(Li *et al.*, 2013), indicating fetal sex-specific expression patterns of  
305 miR-29a/c-3p in PE placentas. To date, although we do not know the exact cell contribution to  
306 this PE-dysregulated miR-29a/c-3p expression, this fetal sex-specific upregulation of miR-29a/c-  
307 3p in PE placentas suggests that this dysregulation may contribute to the PE-impaired placental  
308 functions.

309 The current observation that PE only downregulates miR-29a/c-3p expression in M, but not  
310 in F HUVECs extends our previous report(Zhou *et al.*, 2017; Zhou *et al.*, 2019) and supports our  
311 hypothesis that PE differentially regulates miR-29a/c-3p expression in F and M HUVECs.  
312 However, this differential expression pattern in HUVECs is opposite to that in placentas, indicating  
313 different regulation of miR-29a/c-3p in placental tissues and HUVECs. We have previously  
314 reported that F HUVECs are transcriptionally more responsive to PE than their M  
315 counterparts(Zhou *et al.*, 2019). In this study, we found that PE-dysregulated ~4.5-fold of miR-  
316 29a/c-3p target genes in F HUVECs (125 genes) than in M HUVECs (28 genes). These data  
317 imply that while miR-29a/c-3p has a critical role in PE-dysregulated transcriptomes in F and M  
318 HUVECs, F HUVECs are more susceptible to miR-29a/c-3p regulation in PE. It is noteworthy that  
319 there are only five common PE-dysregulated miR-29a/c-3p target genes observed in F and M  
320 cells. However, these five DE genes had opposite regulation directions in F and M HUVECs: all  
321 were down-regulated in F but up-regulated in M HUVECs from PE. These DE genes include

322 Activity Regulated Cytoskeleton Associated Protein (ARC) and Cartilage Intermediate Layer  
323 Protein 2 (CLIP2), both of which are important for intercellular microRNA transportation via  
324 extracellular exosome(Pastuzyn *et al.*, 2018; Hu *et al.*, 2020). Thus, fetal sex-specific  
325 dysregulation of these intercellular microRNA transportation-related genes may contribute to PE-  
326 dysregulated miR-29a/c-3p in HUVECs and fetoplacental tissues. This notion is consistent with  
327 our previous report that PE, in general, dysregulates more cardiovascular/endothelial function-  
328 associated pathways and biological functions in F than in M HUVECs(Zhou *et al.*, 2019), as well  
329 as our observation in the current study that miR-29c-3p expression in PE-F is higher than in PE-  
330 M HUVECs.

331 Many of the PE-dysregulated miR-29a/c-3p target pathways and biological functions (e.g.,  
332 cell movement, cell viability, angiogenesis, and concentration of  $Ca^{2+}$ ) in HUVECs are associated  
333 with PE-induced fetal endothelial dysfunction (e.g., reduced cell migration, and impaired calcium  
334 signaling) and vascular-related disorders (e.g., atherosclerosis, disorder of blood pressure,  
335 obesity, and seizures)(Wang *et al.*; Powe *et al.*, 2011a; Boeldt *et al.*; Brodowski *et al.*; Zhou *et al.*,  
336 2019; Zhou *et al.*, 2020). These data suggest that miR-29a/c-3p play important roles in vascular  
337 functions during pregnancy and PE-offspring, as PE-offspring are known to face increased risks  
338 of cardiovascular and metabolic disorders(Kajantie *et al.*, 2009; Ryckman *et al.*, 2013).  
339 Furthermore, PE uniquely dysregulated many endothelial function-associated miR-29a/c-3p  
340 target pathways and biological processes in F and M HUVECs. Notably, wound healing signaling,  
341 inflammatory response, and obesity were only enriched in PE-upregulated miR-29a/c-3p target  
342 genes in F HUVECs, while hypertension, stroke, and adhesion of endothelial progenitor cells were  
343 enriched only in PE-upregulated miR-29a/c-3p target genes in M HUVECs (Fig. 2D&E,  
344 Fig.S2&S3). In agreement with a previous report that dysregulated miRNA profiles in HUVECs  
345 are associated with dermal microvascular density neonates(Yu *et al.*, 2018), These observations  
346 suggest that PE-dysregulated miR-29a/c-3p involve in the *in-utero* programming of fetal  
347 endothelial cells and prime PE offspring for higher risks of cardiovascular diseases later in their  
348 life.

349 The current finding that PE dysregulates much more inflammatory- and immune responses  
350 -associated genes (e.g., inflammatory response, adhesion of immune cells, apoptosis of antigen-  
351 presenting cells, NFkB, IL33, and IL1) in F than M HUVECs suggest a fetal sex-specific role of  
352 miR-29a/c-3p in the inflammatory response in PE. This is consistent with reports showing that the  
353 miR-29 family participates in the immunological responses after virus infections (HIV-1 and  
354 SARS-CoV-2)(Abel *et al.*, 2021; Saulle *et al.*, 2021).

355 Consistent with our bioinformatics analysis showing that PE-dysregulated miR-29a/c-3p  
356 target genes/pathways are highly associated with inflammatory responses in F and M HUVECs  
357 (Fig. 2), we observed that PE differentially regulated cell responses to inflammatory-related  
358 cytokines (TGF $\beta$ 1 and TNF $\alpha$ ) in F and M HUVECs. For instance, in agreement with our previous  
359 report(Zhou *et al.*, 2019), TGF $\beta$ 1 strengthens endothelial monolayer integrity only in NT F-  
360 HUVECs, which is abolished in PE, while TNF $\alpha$  decreases endothelial monolayer integrity in  
361 HUVECs. These data confirm the vital role of TGF $\beta$ 1 and TNF $\alpha$  in fetal endothelial functions.

362 We observed that miR-29a/c-3p overexpression increased basal endothelial monolayer  
363 integrity only in NT-F, and miR-29a/c-3p knockdown decreased basal endothelial monolayer  
364 integrity only in NT-M cells, whereas this fetal sex-specific differential regulation was lost in PE-F  
365 and PE-M HUVECs. We also showed that miR-29a/c-3p overexpression further enhanced  
366 TGF $\beta$ 1-strengthened endothelial monolayer integrity in F but not in M NT-HUVECs, while this  
367 fetal sex-specific regulation disappeared in PE HUVECs. Furthermore, miR-29a/c-3p knockdown  
368 recovered the TGF $\beta$ 1-enhanced endothelial monolayer integrity in PE-F HUVECs but did not  
369 affect the monolayer integrity in PE-M cells. Together with our bioinformatic data that PE  
370 dysregulated more TGF $\beta$ 1-regulated miR-29a/c-3p target genes in PE-F than PE-M HUVECs,  
371 these differential regulations implicate the fetal sex-specific importance of miR-29a/c-3p in  
372 maintaining basal and TGF $\beta$ 1-induced endothelial monolayer integrity responses in HUVECs.  
373 Overall, PE-F HUVECs are more susceptible to miR-29a/c-3p regulated endothelial monolayer  
374 integrity responses than PE-M cells.

375 Overexpression and knockdown of miR-29a/c-3p do not alter the basal cell proliferation as  
376 well as cell proliferation in response to TGF $\beta$ 1 and TNF $\alpha$  in NT HUVECs, indicating that miR-  
377 29a/c-3p is not critical to maintain the basal as well as TGF $\beta$ 1- and TNF $\alpha$ -regulated cell  
378 proliferation responses in NT HUVECs. However, overexpression of miR-29a/c-3p recovers the  
379 TNF $\alpha$ -induced cell proliferation in PE-M and brings it to similar levels of NT-M cells. It appears  
380 that PE-M HUVECs are more responsive to the miR-29a/c-3p regulated cell proliferative  
381 responses than PE-F cells.

382 As the human umbilical vein carries oxygenated blood from the placenta to the growing fetus  
383 during pregnancy, HUVECs are a unique cell population that is directly exposed to altered  
384 humoral factors derived from placenta and maternal circulation and share many features of artery  
385 endothelial cells(Inoue *et al.*, 1998; Lang *et al.*, 2008; Jiang *et al.*, 2013). Although a direct  
386 relationship between endothelial dysfunction observed in primary HUVECs and specific long-term  
387 cardiovascular risks in the offspring remain elusive, the emerging evidence has shown that  
388 dysregulated miRNA expression and dysfunction of HUVECs from hypertensive pregnancies

389 including PE are associated with vascular dysfunction in offspring(Powe *et al.*, 2011b; Staley *et*  
390 *al.*, 2015; Yu *et al.*, 2018).

391

## 392 **Conclusions**

393 Our data have demonstrated that PE differentially dysregulates the expression of miR-29a/c-  
394 3p, miR-29a/c-3p target genes/pathways, and miR-29a/c-3p-associated endothelial cell function  
395 in response to TGF $\beta$ 1 and TNF $\alpha$  in F and M HUVECs. These fetal sex-specific dysregulations  
396 may contribute to fetal sex-specific vascular dysfunction in PE and PE-associated adult-onset  
397 cardiovascular diseases in PE offspring.

## 398 **Perspectives**

399 To date, there are limited therapeutic options for PE-induced fetal endothelial dysfunction  
400 due to our poor understanding of cellular and molecular mechanisms underlying PE. Here we  
401 reported fetal sexual dimorphic regulation of miR-29a/c-3p and miR-29a/c-3p target  
402 genes/pathways in HUVECs in PE. We also demonstrated fetal sex-specific dysregulation of miR-  
403 29a/c-3p-associated cellular responses to TGF $\beta$ 1 and TNF $\alpha$  in PE HUVECs. These sexual  
404 dimorphisms of PE-dysregulated miR-29a/c-3p and their target genes/pathways may allow the  
405 discovery of novel fetal sex-specific therapeutic targets and risk predictors for adult-onset  
406 cardiovascular diseases in children born to PE mothers.

407

## 408 **Acknowledgments**

409 We would like to thank Laura Hogan, Ph.D., a Science Editor at the University of Wisconsin  
410 Institute for Clinical and Translational Research (UW ICTR), for critically reading and editing this  
411 manuscript.

412

## 413 **Sources of Funding**

414 This study is supported by the American Heart Association award 19CDA34660348(CZ),  
415 National Institutes of Health (NIH) grant R03HD100778(CZ), and Translational Basic and Clinical  
416 Pilot Award (CZ and JZ) from the UW ICTR as well as the Clinical and Translational Science  
417 Award program through the NIH National Center for Advancing Translational Sciences  
418 (UL1TR002373). The content is solely the responsibility of the authors and does not necessarily  
419 represent the official views of the NIH.

420

## 421 **Conflict of Interest/Disclosure Statement**

422 The authors have no conflict of interest.

423 **References**

- 424 Abel T, Moodley J & Naicker T. (2021). The Involvement of MicroRNAs in SARS-CoV-2 Infection  
425 Comorbid with HIV-Associated Preeclampsia. *Curr Hypertens Rep* **23**, 20.
- 426 Addis R, Campesi I, Fois M, Capobianco G, Dessole S, Fenu G, Montella A, Cattaneo MG,  
427 Vicentini LM & Franconi F. (2014). Human umbilical endothelial cells (HUVECs) have a sex:  
428 characterisation of the phenotype of male and female cells. *Biology of sex differences* **5**, 18-  
429 12. eCollection 2014.
- 430 American College of Obstetrics, Gynecologists & Task Force on Hypertension in Pregnancy.  
431 (2013). Hypertension in pregnancy. Report of the American College of Obstetricians and  
432 Gynecologists' Task Force on Hypertension in Pregnancy. *Obstetrics and gynecology* **122**,  
433 1122-1131.
- 434 Anderson UD, Olsson MG, Kristensen KH, Akerstrom B & Hansson SR. (2012). Review:  
435 Biochemical markers to predict preeclampsia. *Placenta* **33 Suppl**, 42.
- 436 Askie LM, Duley L, Henderson-Smart DJ, Stewart LA & Group PC. (2007). Antiplatelet agents for  
437 prevention of pre-eclampsia: a meta-analysis of individual patient data. *Lancet* **369**, 1791-  
438 1798.
- 439 Benyo DF, Smarason A, Redman CW, Sims C & Conrad KP. (2001). Expression of inflammatory  
440 cytokines in placentas from women with preeclampsia. *The Journal of clinical endocrinology*  
441 *and metabolism* **86**, 2505-2512.
- 442 Boeldt DS, Hankes AC, Alvarez RE, Khurshid N, Balistreri M, Grummer MA, Yi F & Bird IM.  
443 (2014). Pregnancy programming and preeclampsia: identifying a human endothelial model to  
444 study pregnancy-adapted endothelial function and endothelial adaptive failure in preeclamptic  
445 subjects. *Advances in Experimental Medicine and Biology* **814**, 27-47.
- 446 Brodowski L, Burlakov J, Hass S, von Kaisenberg C & von Versen-Hoyneck F. (2017). Impaired  
447 functional capacity of fetal endothelial cells in preeclampsia. *PLoS one* **12**, e0178340.
- 448 Collins T, Read MA, Neish AS, Whitley MZ, Thanos D & Maniatis T. (1995). Transcriptional  
449 regulation of endothelial cell adhesion molecules: NF-kappa B and cytokine-inducible  
450 enhancers. *FASEB journal : official publication of the Federation of American Societies for*  
451 *Experimental Biology* **9**, 899-909.
- 452 Gu Y, Sun J, Groome LJ & Wang Y. (2013). Differential miRNA expression profiles between the  
453 first and third trimester human placentas. *Am J Physiol Endocrinol Metab* **304**, E836-843.
- 454 Hsu KS, Guan BJ, Cheng X, Guan D, Lam M, Hatzoglou M & Kao HY. (2016). Translational  
455 control of PML contributes to TNFalpha-induced apoptosis of MCF7 breast cancer cells and  
456 decreased angiogenesis in HUVECs. *Cell death and differentiation* **23**, 469-483.

- 457 Hu W, Li K, Han H, Geng S, Zhou B, Fan X, Xu S, Yang M, Liu H, Yang G & Liu Y. (2020).  
458 Circulating Levels of CILP2 Are Elevated in Coronary Heart Disease and Associated with  
459 Atherosclerosis. *Oxid Med Cell Longev* **2020**, 1871984.
- 460 Hung TH, Charnock-Jones DS, Skepper JN & Burton GJ. (2004). Secretion of tumor necrosis  
461 factor-alpha from human placental tissues induced by hypoxia-reoxygenation causes  
462 endothelial cell activation in vitro: a potential mediator of the inflammatory response in  
463 preeclampsia. *The American journal of pathology* **164**, 1049-1061.
- 464 Inoue I, Shino K, Noji S, Awata T & Katayama S. (1998). Expression of peroxisome proliferator-  
465 activated receptor alpha (PPAR alpha) in primary cultures of human vascular endothelial cells.  
466 *Biochem Biophys Res Commun* **246**, 370-374.
- 467 Jiang C, Fang X, Jiang Y, Shen F, Hu Z, Li X & Huang X. (2016). TNF-alpha induces vascular  
468 endothelial cells apoptosis through overexpressing pregnancy induced noncoding RNA in  
469 Kawasaki disease model. *The international journal of biochemistry & cell biology* **72**, 118-124.
- 470 Jiang YZ, Wang K, Li Y, Dai CF, Wang P, Kendzioriski C, Chen DB & Zheng J. (2013).  
471 Transcriptional and functional adaptations of human endothelial cells to physiological chronic  
472 low oxygen. *Biology of reproduction* **88**, 114.
- 473 Kajantie E, Eriksson JG, Osmond C, Thornburg K & Barker DJ. (2009). Pre-eclampsia is  
474 associated with increased risk of stroke in the adult offspring: the Helsinki birth cohort study.  
475 *Stroke; a journal of cerebral circulation* **40**, 1176-1180.
- 476 Karagkouni D, Paraskevopoulou MD, Chatzopoulos S, Vlachos IS, Tastsoglou S, Kanellos I,  
477 Papadimitriou D, Kavakiotis I, Maniou S, Skoufos G, Vergoulis T, Dalamagas T &  
478 Hatzigeorgiou AG. (2018). DIANA-TarBase v8: a decade-long collection of experimentally  
479 supported miRNA-gene interactions. *Nucleic Acids Res* **46**, D239-d245.
- 480 Kim J, Lee KS, Kim JH, Lee DK, Park M, Choi S, Park W, Kim S, Choi YK, Hwang JY, Choe J,  
481 Won MH, Jeoung D, Lee H, Ryoo S, Ha KS, Kwon YG & Kim YM. (2017). Aspirin prevents  
482 TNF-alpha-induced endothelial cell dysfunction by regulating the NF-kappaB-dependent miR-  
483 155/eNOS pathway: Role of a miR-155/eNOS axis in preeclampsia. *Free radical biology &*  
484 *medicine* **104**, 185-198.
- 485 Kramer A, Green J, Pollard J, Jr. & Tugendreich S. (2014). Causal analysis approaches in  
486 Ingenuity Pathway Analysis. *Bioinformatics (Oxford, England)* **30**, 523-530.
- 487 Lang I, Schweizer A, Hiden U, Ghaffari-Tabrizi N, Hagendorfer G, Bilban M, Pabst MA, Korgun  
488 ET, Dohr G & Desoye G. (2008). Human fetal placental endothelial cells have a mature arterial  
489 and a juvenile venous phenotype with adipogenic and osteogenic differentiation potential.  
490 *Differentiation* **76**, 1031-1043.

- 491 Lau SY, Guild SJ, Barrett CJ, Chen Q, McCowan L, Jordan V & Chamley LW. (2013). Tumor  
492 necrosis factor-alpha, interleukin-6, and interleukin-10 levels are altered in preeclampsia: a  
493 systematic review and meta-analysis. *American journal of reproductive immunology (New*  
494 *York, NY: 1989)* **70**, 412-427.
- 495 Li H, Ge Q, Guo L & Lu Z. (2013). Maternal plasma miRNAs expression in preeclamptic  
496 pregnancies. *BioMed research international* **2013**, 970265.
- 497 Lorenz M, Koschate J, Kaufmann K, Kreye C, Mertens M, Kuebler WM, Baumann G, Gossing G,  
498 Marki A, Zakrzewicz A, Mieville C, Benn A, Horbelt D, Wratil PR, Stangl K & Stangl V. (2015).  
499 Does cellular sex matter? Dimorphic transcriptional differences between female and male  
500 endothelial cells. *Atherosclerosis* **240**, 61-72.
- 501 Mahboubi K, Biedermann BC, Carroll JM & Pober JS. (2000). IL-11 activates human endothelial  
502 cells to resist immune-mediated injury. *Journal of immunology (Baltimore, Md: 1950)* **164**,  
503 3837-3846.
- 504 Muy-Rivera M, Sanchez SE, Vadachkoria S, Qiu C, Bazul V & Williams MA. (2004). Transforming  
505 growth factor-beta1 (TGF-beta1) in plasma is associated with preeclampsia risk in Peruvian  
506 women with systemic inflammation. *American journal of hypertension* **17**, 334-338.
- 507 Paraskevopoulou MD, Georgakilas G, Kostoulas N, Vlachos IS, Vergoulis T, Reczko M, Filippidis  
508 C, Dalamagas T & Hatzigeorgiou AG. (2013). DIANA-microT web server v5.0: service  
509 integration into miRNA functional analysis workflows. *Nucleic Acids Res* **41**, W169-173.
- 510 Pastuzyn ED, Day CE, Kearns RB, Kyrke-Smith M, Taibi AV, McCormick J, Yoder N, Belnap DM,  
511 Erlendsson S, Morado DR, Briggs JAG, Feschotte C & Shepherd JD. (2018). The Neuronal  
512 Gene Arc Encodes a Repurposed Retrotransposon Gag Protein that Mediates Intercellular  
513 RNA Transfer. *Cell* **172**, 275-288.e218.
- 514 Peracoli JC, Rudge MV & Peracoli MT. (2007). Tumor necrosis factor-alpha in gestation and  
515 puerperium of women with gestational hypertension and pre-eclampsia. *American journal of*  
516 *reproductive immunology (New York, NY: 1989)* **57**, 177-185.
- 517 Poliseno L, Tuccoli A, Mariani L, Evangelista M, Citti L, Woods K, Mercatanti A, Hammond S &  
518 Rainaldi G. (2006). MicroRNAs modulate the angiogenic properties of HUVECs. *Blood* **108**,  
519 3068-3071.
- 520 Powe CE, Levine RJ & Karumanchi SA. (2011a). Preeclampsia, a disease of the maternal  
521 endothelium: the role of antiangiogenic factors and implications for later cardiovascular  
522 disease. *Circulation* **123**, 2856-2869.



- 523 Powe CE, Levine RJ & Karumanchi SA. (2011b). Preeclampsia, a disease of the maternal  
524 endothelium: the role of antiangiogenic factors and implications for later cardiovascular  
525 disease. *Circulation* **123**, 2856-2869.
- 526 Raghupathy R. (2013). Cytokines as key players in the pathophysiology of preeclampsia. *Medical*  
527 *principles and practice : international journal of the Kuwait University, Health Science Centre*  
528 **22 Suppl 1**, 8-19.
- 529 Ryckman KK, Borowski KS, Parikh NI & Saftlas AF. (2013). Pregnancy Complications and the  
530 Risk of Metabolic Syndrome for the Offspring. *Current cardiovascular risk reports* **7**, 217-223.
- 531 Saulle I, Garziano M, Fenizia C, Cappelletti G, Parisi F, Clerici M, Cetin I, Savasi V & Biasin M.  
532 (2021). MiRNA Profiling in Plasma and Placenta of SARS-CoV-2-Infected Pregnant Women.  
533 *Cells* **10**.
- 534 Staley JR, Bradley J, Silverwood RJ, Howe LD, Tilling K, Lawlor DA & Macdonald-Wallis C.  
535 (2015). Associations of blood pressure in pregnancy with offspring blood pressure trajectories  
536 during childhood and adolescence: findings from a prospective study. *Journal of the American*  
537 *Heart Association* **4**, 10.1161/JAHA.1114.001422.
- 538 Stevens W, Shih T, Incerti D, Ton TGN, Lee HC, Peneva D, Macones GA, Sibai BM & Jena AB.  
539 (2017). Short-term costs of preeclampsia to the United States health care system. *American*  
540 *Journal of Obstetrics and Gynecology* **217**, 237-248.e216.
- 541 Sunderland NS, Thomson SE, Heffernan SJ, Lim S, Thompson J, Ogle R, McKenzie P, Kirwan  
542 PJ, Makris A & Hennessy A. (2011). Tumor necrosis factor alpha induces a model of  
543 preeclampsia in pregnant baboons (*Papio hamadryas*). *Cytokine* **56**, 192-199.
- 544 Ten Dijke P & Arthur HM. (2007). Extracellular control of TGFbeta signalling in vascular  
545 development and disease. *Nature reviewsMolecular cell biology* **8**, 857-869.
- 546 Thum T, Galuppo P, Wolf C, Fiedler J, Kneitz S, van Laake LW, Doevendans PA, Mummery CL,  
547 Borlak J, Haverich A, Gross C, Engelhardt S, Ertl G & Bauersachs J. (2007). MicroRNAs in  
548 the human heart: a clue to fetal gene reprogramming in heart failure. *Circulation* **116**, 258-  
549 267.
- 550 Ukai T, Sato M, Akutsu H, Umezawa A & Mochida J. (2012). MicroRNA-199a-3p, microRNA-  
551 193b, and microRNA-320c are correlated to aging and regulate human cartilage metabolism.  
552 *Journal of orthopaedic research : official publication of the Orthopaedic Research Society* **30**,  
553 1915-1922.
- 554 Van Antwerp DJ, Martin SJ, Verma IM & Green DR. (1998). Inhibition of TNF-induced apoptosis  
555 by NF-kappa B. *Trends in cell biology* **8**, 107-111.

- 556 Walshe TE, Saint-Geniez M, Maharaj AS, Sekiyama E, Maldonado AE & D'Amore PA. (2009).  
557 TGF-beta is required for vascular barrier function, endothelial survival and homeostasis of the  
558 adult microvasculature. *PLoS one* **4**, e5149.
- 559 Wang J, Wang Y, Wang Y, Ma Y, Lan Y & Yang X. (2013). Transforming growth factor beta-  
560 regulated microRNA-29a promotes angiogenesis through targeting the phosphatase and  
561 tensin homolog in endothelium. *The Journal of biological chemistry* **288**, 10418-10426.
- 562 Wang Y, Gu Y, Zhang Y & Lewis DF. (2004). Evidence of endothelial dysfunction in preeclampsia:  
563 decreased endothelial nitric oxide synthase expression is associated with increased cell  
564 permeability in endothelial cells from preeclampsia. *American Journal of Obstetrics and*  
565 *Gynecology* **190**, 817-824.
- 566 Wang Y & Walsh SW. (1996). TNF alpha concentrations and mRNA expression are increased in  
567 preeclamptic placentas. *Journal of reproductive immunology* **32**, 157-169.
- 568 Wu F, Yang Z & Li G. (2009). Role of specific microRNAs for endothelial function and  
569 angiogenesis. *Biochemical and biophysical research communications* **386**, 549-553.
- 570 Yang Z, Wu L, Zhu X, Xu J, Jin R, Li G & Wu F. (2013). MiR-29a modulates the angiogenic  
571 properties of human endothelial cells. *Biochemical and biophysical research communications*  
572 **434**, 143-149.
- 573 Yu GZ, Reilly S, Lewandowski AJ, Aye CYL, Simpson LJ, Newton L, Davis EF, Zhu SJ, Fox WR,  
574 Goel A, Watkins H, Channon KM, Watt SM, Kyriakou T & Leeson P. (2018). Neonatal Micro-  
575 RNA Profile Determines Endothelial Function in Offspring of Hypertensive Pregnancies.  
576 *Hypertension (Dallas, Tex: 1979)* **72**, 937-945.
- 577 Yuan JS, Reed A, Chen F & Stewart CN, Jr. (2006). Statistical analysis of real-time PCR data.  
578 *BMC bioinformatics* **7**, 85.
- 579 Zhou C, Yan Q, Zou QY, Zhong XQ, Tyler CT, Magness RR, Bird IM & Zheng J. (2019). Sexual  
580 Dimorphisms of Preeclampsia-Dysregulated Transcriptomic Profiles and Cell Function in  
581 Fetal Endothelial Cells. *Hypertension (Dallas, Tex: 1979)* **74**, 154-163.
- 582 Zhou C, Zou QY, Jiang YZ & Zheng J. (2020). Role of oxygen in fetoplacental endothelial  
583 responses: hypoxia, physiological normoxia, or hyperoxia? *Am J Physiol Cell Physiol* **318**,  
584 C943-c953.
- 585 Zhou C, Zou QY, Li H, Wang RF, Liu AX, Magness RR & Zheng J. (2017). Preeclampsia  
586 Downregulates MicroRNAs in Fetal Endothelial Cells: Roles of miR-29a/c-3p in Endothelial  
587 Function. *The Journal of clinical endocrinology and metabolism* **102**, 3470-3479.
- 588 Zhou CC, Irani RA, Zhang Y, Blackwell SC, Mi T, Wen J, Shelat H, Geng YJ, Ramin SM, Kellems  
589 RE & Xia Y. (2010). Angiotensin receptor agonistic autoantibody-mediated tumor necrosis

590 factor-alpha induction contributes to increased soluble endoglin production in preeclampsia.  
591 *Circulation* **121**, 436-444.

**Table.1.** Patient Demographics\*

| Diagnosis | Fetal sex | N  | Maternal BMI | Maternal age (years) | Gestational age (weeks) | Systolic BP (mmHg) | Diastolic BP (mmHg) | Protein/Creatinine ratio (mg/ml) | Fetal weight (gram) | Apgar Score (5min) |
|-----------|-----------|----|--------------|----------------------|-------------------------|--------------------|---------------------|----------------------------------|---------------------|--------------------|
| NT        | F         | 27 | 24.7 ± 0.6   | 32 ± 0.9             | 39.6 ± 0.2              | 109 ± 2.0          | 70 ± 1.8            | N/A                              | 3459 ± 73.6         | 9 ± 0.1            |
| PE        | F         | 15 | 24.9 ± 0.6   | 33 ± 1.5             | 37.3 ± 0.4              | 148 ± 4.3          | 90 ± 2.1            | 0.5 ± 0.5                        | 3030 ± 143.4        | 9 ± 0.3            |
|           |           |    | P > 0.05     | P > 0.05             | P < 0.05                | P < 0.05           | P < 0.05            |                                  | P < 0.05            | P > 0.05           |
| NT        | M         | 20 | 24.1 ± 0.6   | 30.5 ± 1             | 39.3 ± 0.3              | 118 ± 3.3          | 73 ± 3.5            | N/A                              | 3645 ± 86.5         | 9 ± 0.1            |
| PE        | M         | 13 | 24.7 ± 0.7   | 30 ± 1.2             | 37.6 ± 0.5              | 143 ± 3.2          | 91 ± 2.7            | 0.6 ± 0.4                        | 3150 ± 115.2        | 9 ± 0.2            |
|           |           |    | P > 0.05     | P > 0.05             | P < 0.05                | P < 0.05           | P < 0.05            |                                  | P < 0.05            | P > 0.05           |

592 \*BP: Blood Pressure; NT: Normotensive pregnancy; PE: Preeclampsia. All subjects are Caucasian.

593

**Table.2.** PE-dysregulated miR-29a/c-3p target gene network in female and male P0-HUVECs\*

| Gene Network            | PE vs. NT Female P0-HUVECs |                                      | PE vs. NT Male P0-HUVECs |                                      |
|-------------------------|----------------------------|--------------------------------------|--------------------------|--------------------------------------|
|                         | P-value                    | # Of miR-29a/c-3p Target in DE-Genes | P-value                  | # Of miR-29a/c-3p Target in DE-Genes |
| TNF-Regulated Genes     | 1.35E-14                   | 38                                   | 3.36E-04                 | 9                                    |
| TGFB1-Regulated Genes   | 1.81E-13                   | 36                                   | 7.83E-07                 | 12                                   |
| IFNG-Regulated Genes    | 2.39E-10                   | 28                                   | 1.65E-03                 | 7                                    |
| IL1B-Regulated Genes    | 4.06E-08                   | 21                                   | 4.10E-02                 | 4                                    |
| NFkB-Regulated Genes    | 1.06E-11                   | 20                                   | -                        | -                                    |
| MYC-Regulated Genes     | 2.63E-04                   | 16                                   | 3.25E-03                 | 6                                    |
| AGT-Regulated Genes     | 2.71E-05                   | 15                                   | 6.55E-04                 | 6                                    |
| IL33-Regulated Genes    | 5.62E-07                   | 12                                   | -                        | -                                    |
| FOXO1-Regulated Genes   | 1.36E-05                   | 11                                   | 2.24E-03                 | 4                                    |
| MAPK1-Regulated Genes   | 1.60E-06                   | 11                                   | 9.93E-03                 | 3                                    |
| PDGF BB-Regulated Genes | 6.67E-07                   | 11                                   | 7.78E-03                 | 3                                    |
| F2-Regulated Genes      | 8.76E-07                   | 10                                   | 4.43E-02                 | 2                                    |
| IL1-Regulated Genes     | 6.07E-06                   | 10                                   | -                        | -                                    |
| CSF2-Regulated Genes    | 1.86E-04                   | 10                                   | 2.42E-02                 | 3                                    |

594 \*DE: Differentially expressed. NT: Normotensive pregnancy; PE: Preeclampsia; P0: Passage 0.

595

596 **Figures and Legends**

597

598 **Figure 1. PE differentially dysregulates miR-29a/c-3p in F and M placentas (A) and P0-**

599 **HUVECs (B).** (A) Human placentas were collected immediately after delivery (NT-F, n=18; PE-F,

600 n=12; NT-M, n=20; PE-M, n=14). (B) Individual primary P0-HUVECs preparations were isolated

601 immediately after delivery and isolated within 16h (NT-F, n=27; PE-F, n=15; NT-M, n=20; PE-M,

602 n=13). Data are expressed as fold of the corresponding NT-F group ( $P < 0.05$ , Mann-Whitney

603 Rank Sum Test). \*Differ between PE vs. NT in same fetal sex;  $\Delta$ Differ between F and M within the

604 same diagnostic group (PE or NT).

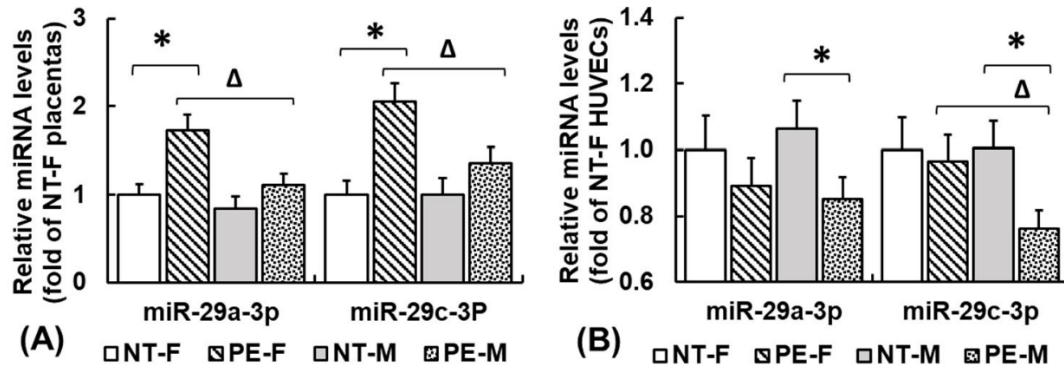

605

606 **Figure 2. PE differentially dysregulates miR-29a/c-3p target genes.** (A) Multi-Dimensional  
 607 Scaling (MDS) plot representing the similarity and disparity among samples based on expression  
 608 patterns of miR-29a/c-3p target genes. Each dot represents one biological sample. Distance  
 609 between dots representing the differences of miR-29a/c-3p target genes expression profiles  
 610 among samples. Eclipse shows the clustering of samples. (B) Circos plot illustrating the  
 611 chromosomal position of DE miR-29a/c-3p target genes between NT-M vs. NT-F (grey dots, 125  
 612 DE-genes), PE-F vs. NT-F (pink dots, 110 DE-genes), and PE-M vs. NT-M (blue dots, 28 DE-  
 613 genes). Each dot represents one gene. The numbers and letters in the outer ring indicate the  
 614 chromosomal location. For each scatter plot track, dots outside and inside of the centerline are  
 615 up- and down-regulated miR-29a/c-3p target genes by PE, respectively. (C) Overlap of DE miR-  
 616 29a/c-3p target genes in NT-M vs NT-F, PE-F vs. NT-F, and PE-M vs. NT-M. Preeclampsia  
 617 differentially dysregulated (D) canonical pathways-, as well as (E) diseases and biological  
 618 functions-associated miR-29a/c-3p target genes in F and M P0-HUVECs. Significant enrichments  
 619 were determined using IPA software ( $P < 0.05$ , Fisher's exact test followed with BH-FDR multiple  
 620 test correction).

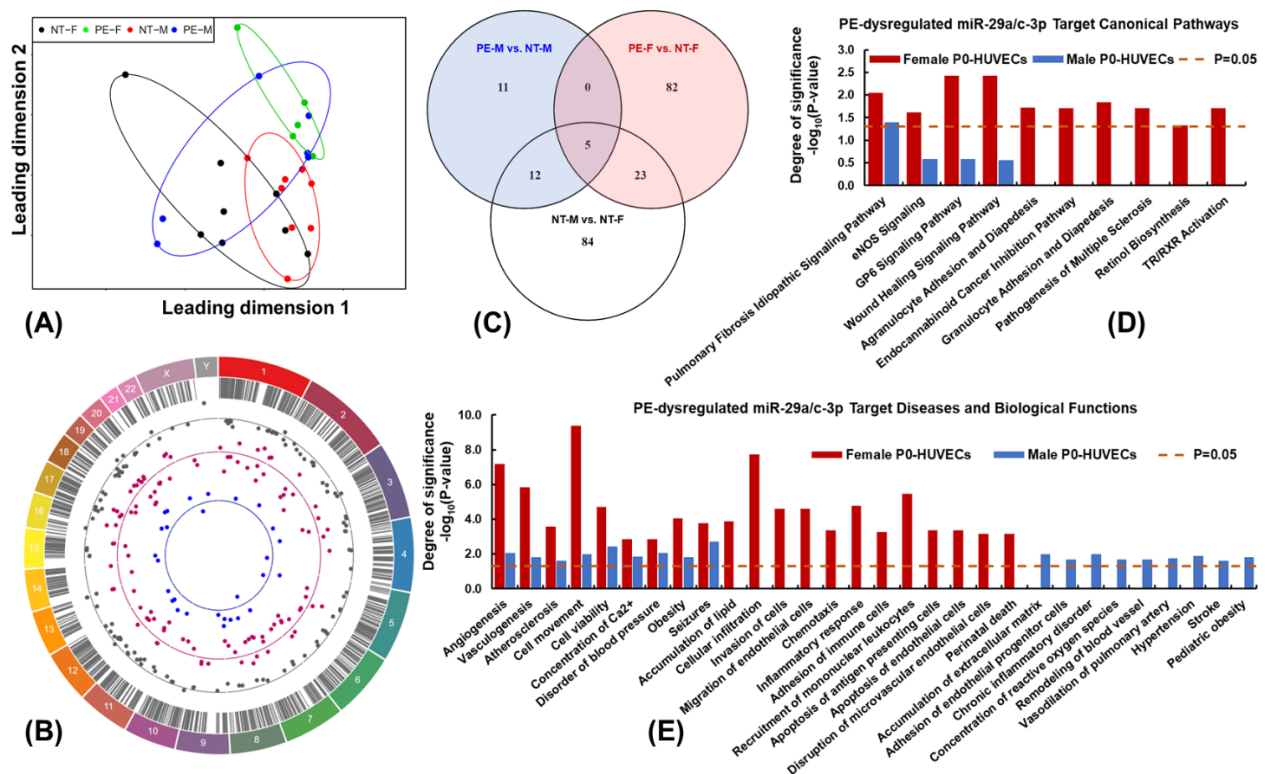

621

622 **Figure 3. MiR-29a/c-3p differentially regulate basal endothelial monolayer integrity in F and**  
 623 **M HUVECs from NT and PE.** Cells were transfected with miR-29a/c-3p(+), miR-29a/c-3p(i),  
 624 Negative Control (NC), or Vehicle (Veh), and then cultured until confluence (24-28h). After 6-8 hr  
 625 of serum starvation, confluent cells were treated with ECMB (serum-free control), TGF $\beta$ 1 (10  
 626 ng/ml), or TNF $\alpha$  (10 ng/ml) for 25h. Electrical resistance at 4000Hz was constantly recorded. Data  
 627 are expressed as medians  $\pm$  SEM fold of corresponding Vehicle control at the corresponding time.  
 628 \*Differ ( $P < 0.05$ ) from Veh control in ECMB;  $\Delta$ Differ from corresponding Veh and NC control  
 629 groups. ( $P < 0.05$ , Kruskal-Wallis test; n = 5-10 cell preparations/sex/group)

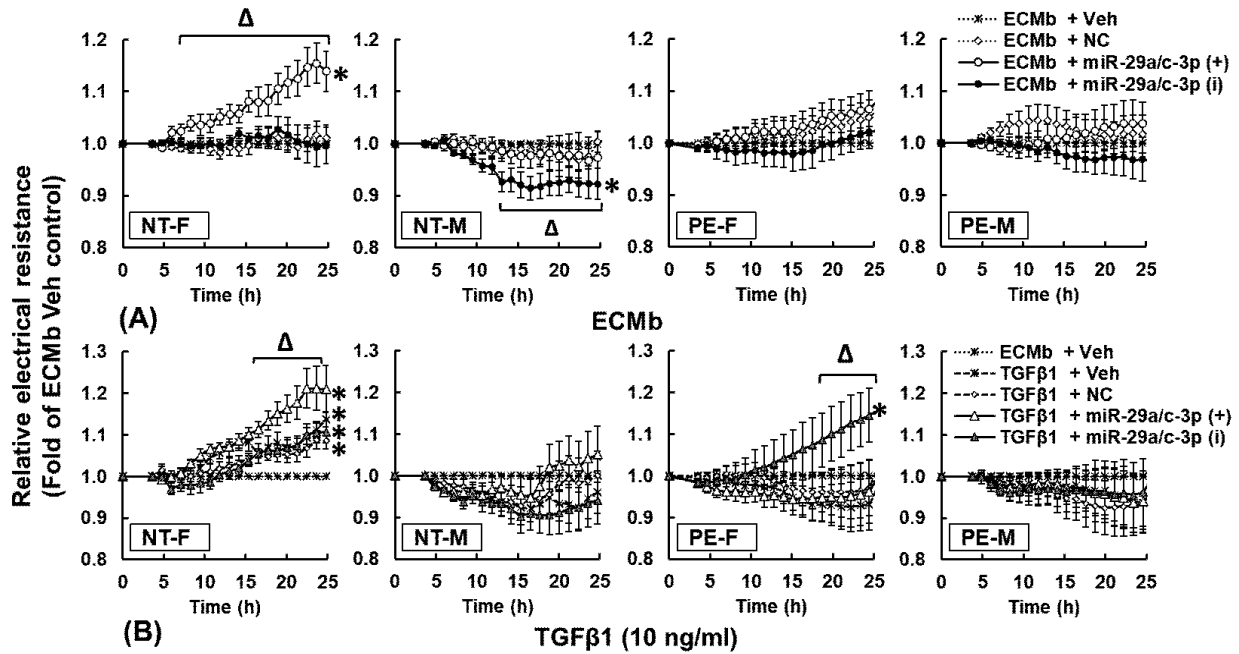

630

631 **Figure 4. Effects of miR-29a/c-3p on cell proliferation in F and M P1-HUVECs from NT and**  
632 **PE.** Sub-confluence cells were transfected with Veh, miR-29a/c-3p(+), or miR-29a/c-3p(i) for 24h.  
633 After 8 hr of serum starvation, sub-confluent cells were treated with ECMb [serum free control;  
634 **(A)**], TGF $\beta$ 1 [10 ng/ml; **(B)**], or TNF $\alpha$  [10ng/ml; **(C)**] for 48h. Data are expressed as medians  $\pm$   
635 SEM fold of ECMb Vehicle control in NT-F. \*Differ from corresponding Veh and NC controls in  
636 ECMb; <sup>A</sup>Differ from corresponding NC and Veh control groups within the same treatment.  
637 ( $P < 0.05$ , Kruskal-Wallis test; n=5-8 cell preparations/sex/group).

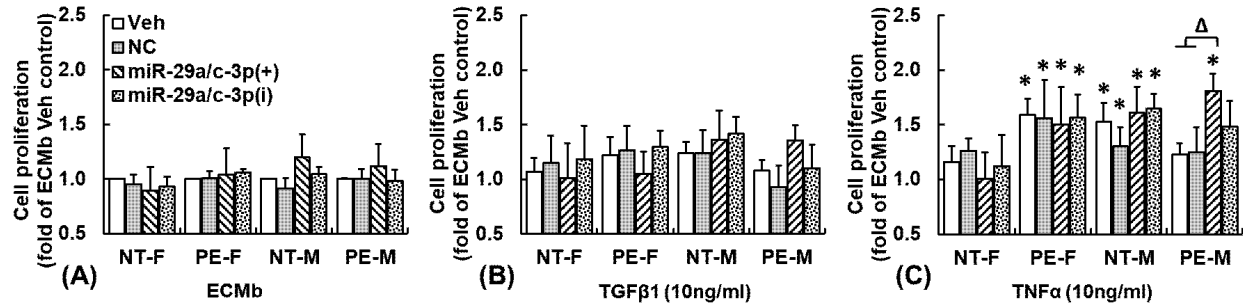

638
